# Supplementary material for: Nationwide “Hospital Emergent Capability Accreditation by Level-Stroke” Improves Stroke Treatment in Taiwan
Source: PubMed Central journal article supplement — J Stroke. 2017 May 31;19(2):205–12. doi: 10.5853/jos.2016.01655 (PMC5466286; doi:10.5853/jos.2016.01655), 2017-05-31
Supplement: jos-2016-01655-supple2.pdf [file jos-2016-01655-supple2.pdf]

**Supplementary Table 1.** Annual data and indicators for AIS patients receiving rtPA therapy at different hospital levels from 2009 to 2014 in the project of "Hospital Emergent Capability Accreditation by Level-Stroke"

| Hospital level                           | HD     |        |        |        |        |        | MoD  |      |      |      |       |       | MeD   |       |       |       |        |        |        |
|------------------------------------------|--------|--------|--------|--------|--------|--------|------|------|------|------|-------|-------|-------|-------|-------|-------|--------|--------|--------|
|                                          | 2009   | 2010   | 2011   | 2012   | 2013   | 2014   | 2009 | 2010 | 2011 | 2012 | 2013  | 2014  | 2009  | 2010  | 2011  | 2012  | 2013   | 2014   |        |
| Hospital no.                             | 27     | 28     | 31     | 33     | 33     | 33     | -    | -    | -    | 7    | 8     | 9     | 9     | 47    | 52    | 62    | 70     | 70     |        |
| Items                                    |        |        |        |        |        |        |      |      |      |      |       |       |       |       |       |       |        |        |        |
| 1. AIS                                   | 10,440 | 13,061 | 17,207 | 18,460 | 17,696 | 17,490 | -    | -    | -    | 912  | 2,305 | 2,235 | 2,027 | 2,041 | 3,844 | 8,588 | 10,793 | 11,568 | 11,254 |
| 2. Eligible for rtPA                     | 274    | 449    | 760    | 797    | 749    | 700    | -    | -    | -    | 43   | 110   | 115   | 128   | 86    | 142   | 444   | 529    | 567    | 633    |
| 3. rtPA administration                   | 319    | 507    | 810    | 834    | 769    | 734    | -    | -    | -    | 41   | 124   | 118   | 147   | 58    | 133   | 270   | 392    | 441    | 489    |
| 4. Qualifying for rtPA criteria          | 261    | 433    | 725    | 754    | 719    | 675    | -    | -    | -    | 42   | 108   | 102   | 114   | 58    | 98    | 278   | 385    | 441    | 489    |
| 5. Administration of rtPA within 60 min. | 78     | 178    | 408    | 483    | 464    | 422    | -    | -    | -    | 24   | 67    | 60    | 90    | 20    | 64    | 127   | 197    | 254    | 311    |
| 6. SICH                                  | 15     | 24     | 47     | 60     | 43     | 40     | -    | -    | -    | 1    | 11    | 4     | 6     | 13    | 38    | 38    | 51     | 60     | 78     |
| Indicator (item no./item no.) (%)        |        |        |        |        |        |        |      |      |      |      |       |       |       |       |       |       |        |        |        |
| Treatment rate (3/1)                     | 3.1    | 3.9    | 4.7    | 4.5    | 4.3    | 4.2    | -    | -    | -    | 4.5  | 5.4   | 5.3   | 7.3   | 2.8   | 3.5   | 3.1   | 3.6    | 3.8    | 4.3    |
| Protocol adherence rate (4/2)            | 95.3   | 96.4   | 95.4   | 94.6   | 96.0   | 96.4   | -    | -    | -    | 97.7 | 98.2  | 88.7  | 89.1  | 67.4  | 69.0  | 62.6  | 72.8   | 77.8   | 77.3   |
| In-time treatment rate (5/3)             | 24.5   | 35.1   | 50.4   | 57.9   | 60.3   | 57.5   | -    | -    | -    | 58.5 | 54.0  | 50.8  | 61.2  | 34.5  | 48.1  | 47.0  | 50.3   | 57.6   | 63.6   |
| SICH rate (6/3)                          | 4.7    | 4.     | 5.8    | 7.2    | 5.6    | 5.4    | -    | -    | -    | 2.4  | 8.9   | 3.4   | 4.1   | 22.4  | 28.6  | 14.1  | 13.0   | 13.6   | 16.0   |

AIS, acute ischemic stroke; rtPA, recombinant tissue plasminogen activator; HD, heavy duty; MeD, medium duty; min., minutes; MoD, moderate duty; no., number; min., minutes; SICH, symptomatic intracranial hemorrhage.

\*No data available till 2011.
