# Supplementary material for: Nationwide “Hospital Emergent Capability Accreditation by Level-Stroke” Improves Stroke Treatment in Taiwan
Source: PubMed Central journal article supplement — J Stroke. 2017 May 31;19(2):205–12. doi: 10.5853/jos.2016.01655 (PMC5466286; doi:10.5853/jos.2016.01655), 2017-05-31
Supplement: jos-2016-01655-supple3.pdf [file jos-2016-01655-supple3.pdf]

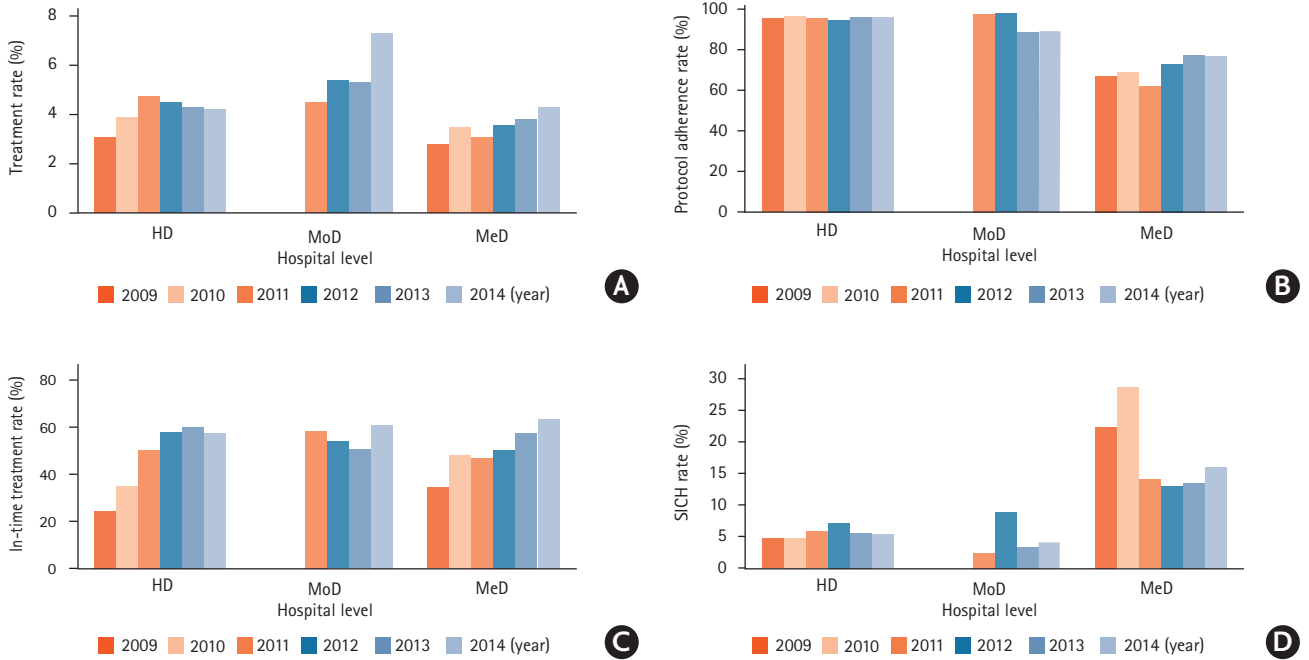

**Supplementary Figure 1.** Annual indices for AIS patients receiving rtPA therapy at different hospital levels from 2009 to 2014 in the project "Hospital Emergent Capability Accreditation by Level-Stroke". (A) Treatment rate, (B) protocol adherence rate, (C) in-time treatment rate, and (D) SICH rate. AIS, acute ischemic stroke; rtPA, recombinant tissue plasminogen activator; HD, heavy duty; MoD, moderate duty; MeD medium duty; SICH, symptomatic intracranial hemorrhage.
